# Supplementary material
Source: HighWire-hosted journal article supplement (https://jama.ama-assn.org/content/suppl/2004/12/21/292.19.2430)

# Hipertrofia ventricular izquierda

La cámara principal del corazón con función de bomba es el **ventrículo izquierdo**. Esta cámara cardíaca bombea la sangre oxigenada a la **aorta**, un grueso vaso sanguíneo que distribuye la sangre a los tejidos corporales. Si el ventrículo izquierdo ha de funcionar con un esfuerzo excesivo, su músculo se **hipertrofia** (se hace más grande) y se engrosa. Este proceso se denomina **hipertrofia del ventrículo izquierdo** (HVI). Debido al aumento del grosor, el riego sanguíneo del propio músculo puede llegar a ser insuficiente, lo que posiblemente dará lugar a **isquemia** cardíaca (falta de sangre y oxígeno en el tejido), **infarto de miocardio** (ataque al corazón) o insuficiencia cardíaca.

En el número de JAMA correspondiente al 17 de noviembre de 2004 se incluyen varios artículos sobre reducción de los riesgos de insuficiencia cardíaca y muerte por HVI mediante el tratamiento de la hipertensión arterial.

## CAUSAS DE HVI

- **Hipertensión** (presión arterial alta).
- **Obesidad**.
- **Estenosis de la válvula aórtica** (disminución del calibre de la válvula que hace pasar la sangre del corazón a la aorta).
- **Miocardiopatía obstructiva** (un tipo hereditario de HVI que entorpece el flujo sanguíneo hacia la aorta debido al desarrollo excesivo del músculo cardíaco).

## SIGNOS Y SÍNTOMAS

- Falta de aliento.
- Mareo.
- Dolor torácico.
- **Palpitaciones** (latido cardíaco irregular).

Puesto que estos signos y síntomas pueden indicar diferentes tipos de alteraciones cardíacas u otras enfermedades, si se experimenta cualquiera de ellos es importante que consulte con su médico. En ocasiones, algunos pacientes desarrollan HVI sin presentar síntomas, de modo que es esencial que se tomen la presión periódicamente.

## DIAGNÓSTICO

- **Electrocardiograma**: representación gráfica del patrón de actividad eléctrica del corazón. En este órgano, la conducción eléctrica cambia cuando el músculo cardíaco se vuelve demasiado grueso.
- **Ecocardiograma**: uso de tecnología de **ultrasonidos** (ondas de sonido) para mostrar una imagen del músculo cardíaco que indica si el tejido muscular cardíaco se ha desarrollado en exceso (hipertrofiado) y si ha afectado o interrumpido en parte el flujo sanguíneo a través del corazón.

## TRATAMIENTO

En general, incluida la prescripción de medicamentos antihipertensivos y la adopción de un estilo de vida favorable (efectuar ejercicio con regularidad, seguir una dieta saludable para mantener el peso en unos límites aceptables y no fumar), ante todo, el tratamiento de la hipertensión arterial puede contribuir a prevenir el desarrollo de HVI. Si ya se ha presentado, el tratamiento de la hipertensión puede detener la progresión de la HVI y también prevenir el desarrollo de la consiguiente insuficiencia cardíaca. Las otras causas de HVI requieren una valoración y un tratamiento especializados.

## PREVENCIÓN DE LA HVI

- Reconocer y tratar la hipertensión arterial antes de que se manifiesten complicaciones como la HVI.
- Reconocer y tratar la estenosis de la válvula aórtica antes de que se lesione el músculo cardíaco.

Fuentes: National Heart, Lung, and Blood Institute, y American Heart Association.

Redactora: Janet M. Torpy, MD

Ilustradora: Tiffany J. Glass, MA

Editor: Richard M. Glass, MD

La "Página de JAMA para el Paciente" es un servicio público de la revista JAMA. La información y recomendaciones que aparecen en esta página son adecuadas en la mayoría de los casos, pero no constituyen el sustituto de un diagnóstico médico. Para una información más específica sobre su caso particular, la revista JAMA le sugiere que consulte con su médico. Los médicos y otros profesionales de asistencia sanitaria pueden reproducir esta página sin fines comerciales y facilitarla a los pacientes. Cualquier otro tipo de reproducción debe someterse a la aprobación de la AMA. Para adquirir separatas, pueden ponerse en contacto con el teléfono +718/946-7424.

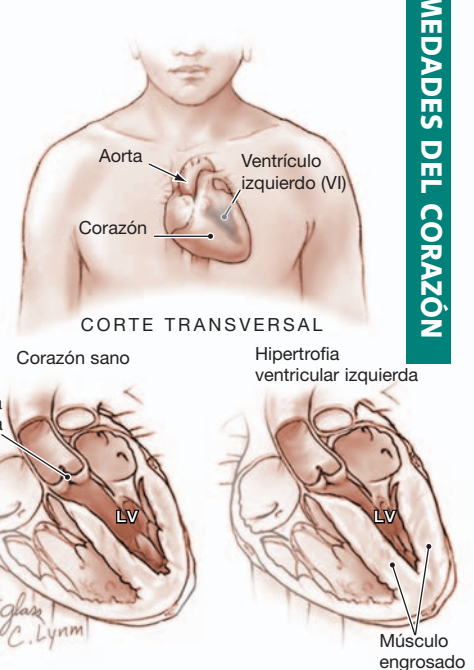

## PARA MÁS INFORMACIÓN

- American Heart Association  
Tel.: 800/AHA-USA-1 (242-8721).  
[www.americanheart.org](http://www.americanheart.org)
- National Heart, Lung, and Blood Institute  
Tel.: 301/592-8573.  
[www.nhlbi.nih.gov](http://www.nhlbi.nih.gov)

## PARA SU PROPIA INFORMACIÓN

Para localizar esta "Página de JAMA para el Paciente" u otras previas, acceda al índice de la "Página para el Paciente" en la web de JAMA ([www.jama.com](http://www.jama.com)). Las "Páginas de JAMA para el Paciente" están disponibles en inglés y en español. En el número correspondiente al 6 de febrero de 2002 se publicó una "Página para el Paciente" sobre insuficiencia cardíaca; en el de 27 de febrero de 2002 sobre hipertensión; el correspondiente al 23-30 de abril de 2003 la dedicó a los electrocardiogramas, y el de fecha 20 de agosto de 2003 a los factores de riesgo de las cardiopatías.

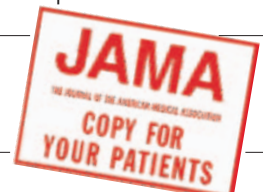

Supplement: pdfpat111704.pdf [file pdfpat111704.pdf]
